## **The Interaction of Genotype and Environment Determines Variation in the Maize Kernel**

**Ionome**

Alexandra Asaro<sup>1</sup>, Greg Ziegler<sup>2</sup>, Cathrine Ziyomo<sup>1</sup>, Owen A. Hoekenga<sup>3</sup>, Brian P. Dilkes<sup>4</sup>, Ivan Baxter<sup>2\*</sup>

<sup>1</sup>Donald Danforth Plant Science Center, St. Louis, Missouri, United States of America

<sup>2</sup>USDA-ARS, Donald Danforth Plant Science Center, St. Louis, Missouri, United States of America

<sup>3</sup>Cayuga Genetics Consulting Group LLC, Ithaca, New York, United States of America

<sup>4</sup>Department of Biochemistry, Purdue University, West Lafayette, Indiana, United States of America

\*Corresponding author

E-mail: [ivan.baxter@ars.usda.gov](mailto:ivan.baxter@ars.usda.gov) (IB)

## 1 **Abstract**

2       Plants obtain soil-resident elements that support growth and metabolism via water-  
3 mediated flow facilitated by transpiration and active transport processes. The availability of  
4 elements in the environment interact with the genetic capacity of organisms to modulate element  
5 uptake through plastic adaptive responses, such as homeostasis. These interactions should cause  
6 the elemental contents of plants to vary such that the effects of genetic polymorphisms  
7 influencing elemental accumulation will be dramatically dependent on the environment in which  
8 the plant is grown. To investigate genotype by environment interactions underlying elemental  
9 accumulation, we analyzed levels of elements in maize kernels of the Intermated B73 x Mo17  
10 (IBM) recombinant inbred population grown in 10 different environments spanning a total of six  
11 locations and five different years. In analyses conducted separately for each environment, we  
12 identified a total of 79 quantitative trait loci controlling seed elemental accumulation. While a set  
13 of these QTL were found in multiple environments, the majority were specific to a single  
14 environment, suggesting the presence of genetic by environment interactions. To specifically  
15 identify and quantify QTL by environment interactions (QEIs), we implemented two methods:  
16 linear modeling with environmental covariates and QTL analysis on trait differences between  
17 growouts. With these approaches, we found several instances of QEI, indicating that elemental  
18 profiles are highly heritable, interrelated, and responsive to the environment.

## 19 **Author Summary**

20       Plants take up elements from the soil, a process that is highly regulated by the plant's  
21 genome. To investigate how maize alters its elemental uptake in response to different  
22 environments, we analyzed the kernel elemental content of a population derived from a cross  
23 grown 10 different times in six locations. We found that environment had a profound effect on

24 which genetic loci were important for elemental accumulation in the kernel. Our results suggest  
25 that to have a full understanding of elemental accumulation in maize kernels and other food  
26 crops, we will need to understand the interactions identified here at the level of the genes and the  
27 environmental variables that contribute to loading essential nutrients into seeds.

## 28 **Introduction**

29 The intake, transport, and storage of elements are key processes underlying plant growth  
30 and survival. A plant must balance mineral levels to prevent accumulation of toxic  
31 concentrations of elements while taking up essential elements for growth. Food crops must strike  
32 similar balances to provide healthy nutrient contents of edible tissues. Adaptation to variation in  
33 soil, water, and temperature requires that plant genomes encode flexible regulation of mineral  
34 physiology to achieve homeostasis (1). This regulation must be responsive both to the  
35 availability of each regulated element in the environment and to the levels of these elements at  
36 the sites of use within the plant. Understanding how the genome encodes responses to element  
37 limitation or toxic excess in nutrient-poor or contaminated soils will help sustain our rapidly  
38 growing human population (2).

39 The concentrations of elements in a plant sample provide a useful read-out for the  
40 environmental, genetic and physiological processes important for plant adaptation. We and  
41 others developed high-throughput and inexpensive pipelines to detect and quantitate 20 different  
42 elemental concentrations by inductively coupled plasma mass spectrometry (ICP-MS). This  
43 process, termed *ionomics*, is the quantitative study of the complete set of mineral nutrients and  
44 trace elements in an organism (its *ionome*) (3). In crop plants such as maize and soybean, seed  
45 element profiles make an ideal study tissue as seeds provide a read-out of physiological status of  
46 the plant and are the food source.

47 Quantitative genetics using structured recombinant inbred populations is a powerful tool  
48 for dissecting the factors underlying elemental accumulation and relationships. By breaking up  
49 linkage blocks through recombination and then fixing these new haplotypes of diverse loci into  
50 mosaic sets of lines, these populations allow similar sets of alleles to be repeatedly tested in  
51 diverse environments (4). A variety of quantitative statistical approaches can then be used to  
52 identify QTL by environment interactions (QEI).

53 Here, we used elemental profiling of a maize recombinant inbred population grown in  
54 multiple environments to identify QTL and QEI underlying elemental accumulation. We sought  
55 both environmental and genetic determinants by implementing single-environment QTL  
56 mapping and analyses of combined data from multiple environments. Overall, we detected 79  
57 loci controlling elemental accumulation, many of which were environment-specific, and  
58 identified loci exhibiting significant QEI.

## 59 **Results**

### 60 **Genetic Regulation of Elemental Traits**

61 The data used for this study is comprised of 20 elements measured in the seeds from *Zea*  
62 *mays* L. Intermated B73 x Mo17 recombinant inbred line (IBM) populations grown in 10  
63 different location/year settings. The IBM population is a widely studied maize population of 302  
64 intermated recombinant inbred lines, each of which have been genotyped with a set of 4,217 bi-  
65 allelic single nucleotide polymorphism (SNP) genetic markers (5). The four rounds of  
66 intermating and subsequent inbreeding resulted in more recombination and a longer genetic map  
67 for the IBM than for typical biparental recombinant inbred line populations. The number of  
68 individuals, marker density, and greater recombination facilitates more precise QTL localization  
69 than a standard RIL population (6–11). This greater resolution reduces the number of genes

70 within a QTL support interval and increases the utility of QTL mapping as a hypothesis test for  
71 shared genetic regulation of multiple traits and aids in the discovery of the molecular identity of  
72 genes affecting QTL. For this study, subsets of the IBM population were grown at Homestead,  
73 Florida in 2005 (FL05) and 2006 (FL06), West Lafayette, Indiana in 2009 (IN09) and 2010  
74 (IN10), Clayton, North Carolina in 2006 (NC06), Poplar Ridge, New York in 2005 (NY05),  
75 2006 (NY06), and 2012 (NY12), Columbia, Missouri in 2006 (MO06), and Limpopo, South  
76 Africa in 2010 (SA10) (Table S1). While very few of the 233 unique IBM lines in the  
77 experiment were grown in all environments, 106 of the 233 lines were grown in 7 or more  
78 environments and 199 were grown in 3 or more environments. Within each growout, all samples  
79 were treated identically: seeds from all environments were stored in temperature and humidity  
80 controlled storage rooms after harvest and then shipped to the ionomics lab. We do not expect  
81 any change in ion composition from storage within a growout, however we cannot rule out that  
82 some of the differences between growouts might be due to slightly different moisture content.  
83 These differences are not likely to account for the genetic by environment interactions we  
84 observe as they should have similar effects on all lines. Single seeds were profiled for the  
85 quantities of 20 elements using ICP-MS and these measurements were normalized to seed weight  
86 and technical sources of variation using a linear model with the resulting values used as the  
87 elemental traits for all analysis (12). After outlier removal, seed element phenotypes were  
88 derived by averaging line replicates (kernels subsampled out of pooled ears from a row) within  
89 an environment.

90 Variation in the elemental traits was affected by both environment and genotype.  
91 Elemental traits generally exhibited lower heritability among genotypes grown across multiple  
92 environments than among genotype replicates within a single environment (Table 1). The broad-

93 sense heritability ( $H^2$ ) of seed weight, 15 of 21 elements in NY05, 13 of 21 elements in NC06,  
 94 and 13 of 21 elements in MO06 exceeded 0.60. Elements exhibiting low heritability within  
 95 environments corresponded to the elements that are prone to analytical artifacts or present near  
 96 the limits of detection by our methods, such as B, Al, and As. Seven elements had a broad sense  
 97 heritability of at least 0.45 in a single environment (NY05, NC06, and NY06) but less than 0.1  
 98 across all environments. This decrease in heritability across the experiment, which was  
 99 particularly striking for Mg, P, S, and Ni, is consistent with strong genotype by environment  
 100 interactions governing the accumulation of these elements.

101 **Table 1. Broad-sense heritability ( $H^2$ ) of element concentrations.**

| <b>Trait</b> | <b>All env</b> | <b>NY05</b> | <b>NC06</b> | <b>MO06</b> |
|--------------|----------------|-------------|-------------|-------------|
| Seed Weight  | 0.51           | 0.59        | 0.69        | 0.89        |
| B            | 0.02           | 0.35        | 0.51        | 0.06        |
| Na           | 0.11           | 0.34        | 0.23        | 0.19        |
| Mg           | 0.04           | 0.77        | 0.69        | 0.75        |
| Al           | 0.10           | 0.39        | 0.50        | 0.08        |
| P            | 0.04           | 0.62        | 0.69        | 0.33        |
| S            | 0.05           | 0.73        | 0.77        | 0.51        |
| K            | 0.07           | 0.69        | 0.72        | 0.36        |
| Ca           | 0.15           | 0.65        | 0.63        | 0.77        |
| Mn           | 0.16           | 0.80        | 0.80        | 0.75        |
| Fe           | 0.07           | 0.76        | 0.73        | 0.63        |
| Co           | 0.08           | 0.65        | 0.54        | 0.42        |
| Ni           | 0.06           | 0.84        | 0.54        | 0.82        |
| Cu           | 0.20           | 0.80        | 0.75        | 0.92        |
| Zn           | 0.07           | 0.68        | 0.73        | 0.86        |
| As           | 0.02           | 0.37        | 0.45        | 0.01        |
| Se           | 0.04           | 0.32        | 0.35        | 0.68        |
| Rb           | 0.03           | 0.49        | 0.45        | 0.69        |
| Sr           | 0.07           | 0.61        | 0.48        | 0.53        |
| Mo           | 0.29           | 0.85        | 0.73        | 0.96        |
| Cd           | 0.55           | 0.71        | 0.69        | 0.24        |

102 All env: Line replicate averages from each location  
 103 NY05: 50 lines with 2 reps, 199 lines with 3 reps  
 104 NC06: 121 lines with 2 reps, 53 lines with 3 reps, 4 lines with 4 reps  
 105 MO06: 50 lines with 2 reps, 18 lines with 3 reps

106 \*outliers for each element calculated with outlier removal function, designated as NA  
107 \*for each single environment, for each trait, only lines w/o missing data and with reps >1 used to  
108 calculate heritability

109  
110 A stepwise algorithm, implemented via *stepwiseqtl* in the R package R/qtl (13), was used  
111 to map QTL for seed weight and 20 seed elemental phenotypes. The stepwise algorithm iterates  
112 through the genome and tests for significant allelic effects for each marker on a phenotype.  
113 Forward and backward regression was used to generate final genome-wide QTL models for each  
114 trait. This QTL mapping procedure was completed for each of the IBM populations from each of  
115 the 10 environments for all 21 traits as separate analyses. QTL significance were determined  
116 using the 95<sup>th</sup> percentile threshold from 1000 *scanone* permutations as a penalty score for adding  
117 QTL to the stepwise model (14).

118 The environmental dependence on QTL detection was first estimated by identifying QTL  
119 common to multiple environments. If QTL detected in two or more growouts affected the same  
120 element and localized less than 5 cM apart they were considered to be the same locus. Across the  
121 10 environments, a total of 79 QTL were identified for seed weight and 18 of the 20 elemental  
122 traits tested (none for Al or Co) (Fig 1B &C). Of these QTL, 63 were detected in a single  
123 environment and 16 were detected in multiple environments. The 16 QTL found in multiple  
124 environments included QTL detected in nearly all of the environments and QTL detected in only  
125 two. One QTL for Mo accumulation, on chromosome 1 in the genetic region containing the  
126 maize ortholog of the Arabidopsis molybdenum transporter MOT1 (15), was found in nine  
127 environments (Fig 1A). Another QTL affecting Cd accumulation, on chromosome 2 and without  
128 a clear candidate gene, was found in eight environments. Other QTL were only present in a  
129 smaller set of environments, such as the QTL for Ni accumulation on chromosome 9, which was  
130 found in five environments (Fig 1D). The strength of association and percent variance explained

131 showed strong differences between environments even for these QTL that were detected in  
 132 multiple environments (Table S2).

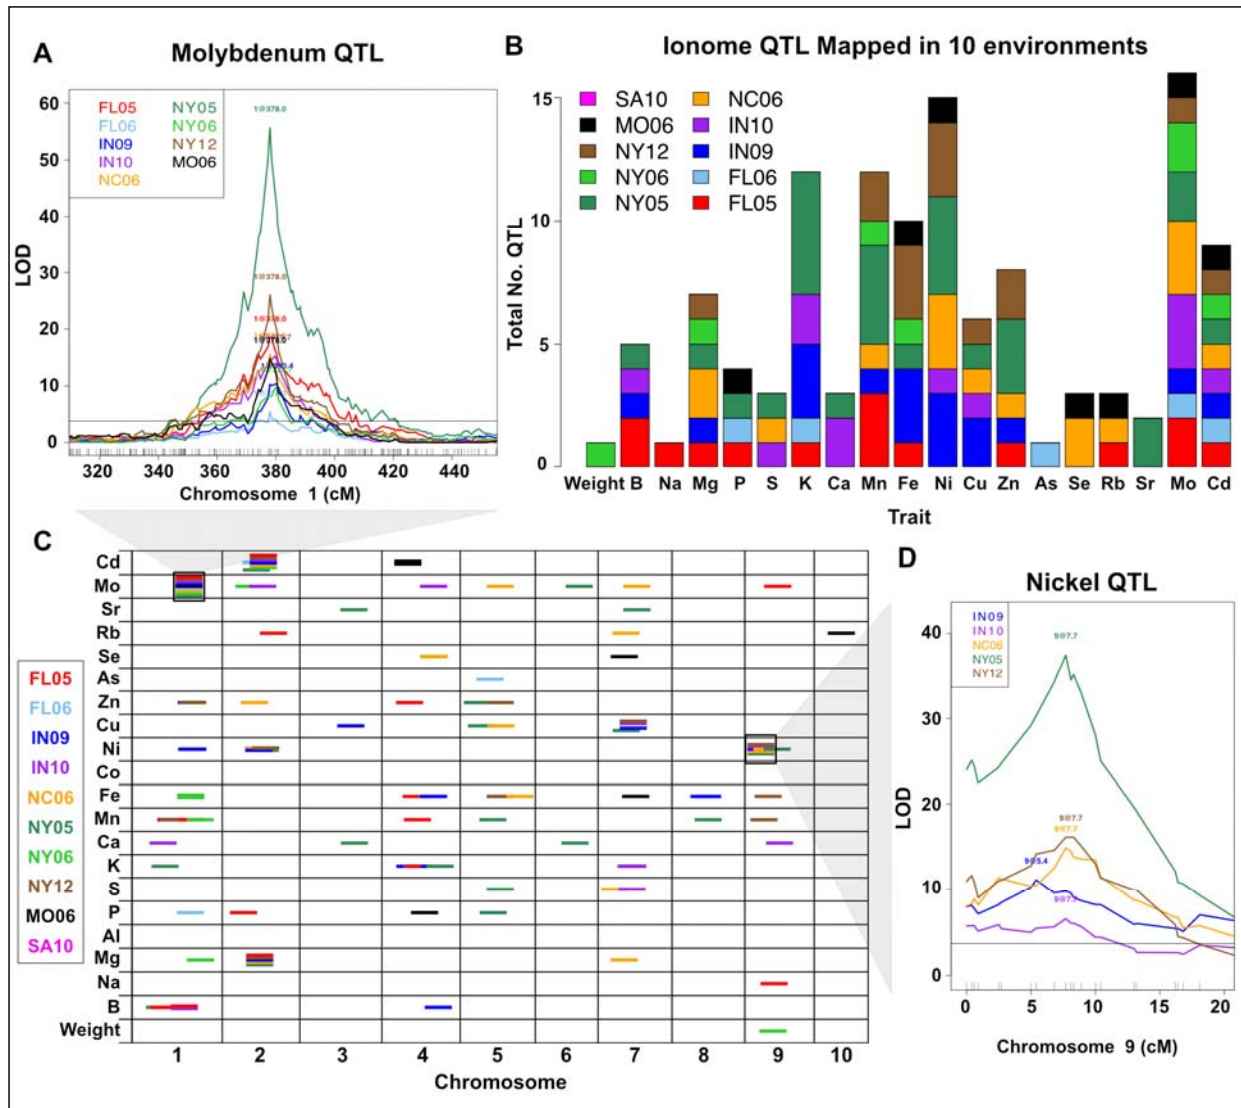

133

134 **Fig 1. Ionome QTL from 10 Environments.** QTL identified for seed weight and 20 element  
 135 accumulation traits using the B73 x M017 intermated RIL population grown in 10 environments.  
 136 (A) QTL on chromosome 1 affecting variation in molybdenum accumulation. An interval of  
 137 Chr1 is shown on the x-axis (in centi-Morgans). The LOD score for the trait-genotype  
 138 association is shown on the y-axis. The horizontal line is a significance threshold from 1000  
 139 random permutations ( $\alpha=0.05$ ). The LOD profiles are plotted for all environments in which the  
 140 highlighted QTL was detected. (B) Total number of QTL detected for each trait, colored by  
 141 environment. (C) Significant QTL ( $\alpha=0.05$ ) for each trait. QTL location is shown across the 10  
 142 maize chromosomes (in cM) on the x-axis. Dashes indicate QTL, with environment in which  
 143 QTL was found designated by color. All dashes are the same length for visibility. The two black  
 144 boxes around dashes correspond to LOD profiles traces in (A) and (D). (D) Stepwise QTL



145 mapping output for nickel on chromosome 9. LOD profiles are plotted for all environments in  
146 which the QTL is significant.

147  
148  
149 As seen in the full-genome view of all QTL colored by environment (Fig 1C), there is a  
150 high incidence of QTL found in single locations. There are three hypotheses that could explain  
151 the large proportion of QTL found only in a single location: 1) strong QTL by environment  
152 interaction effects, 2) false positive detection of a QTL in an individual location and 3) false  
153 negatives assessment of QTL absence due to genetic action but statistical assessment below the  
154 permutation threshold in other locations. To reduce the risk of false positives in a single  
155 environment's QTL set, the significance threshold was raised to the 99<sup>th</sup> percentile, where 31 of  
156 the 63 location-specific QTL remained significant. Despite the large number of trait/environment  
157 combinations tested (20 traits in 10 environments), the number of QTLs detected is much larger  
158 than the null expectation derived from a Bonferroni correction: 10 QTL (95<sup>th</sup> percentile  
159 threshold) and two QTL (99<sup>th</sup> percentile threshold). To account for false negatives, we scanned  
160 for QTL using a more permissive 75<sup>th</sup> percentile cutoff. Of the 63 single-environment QTL, only  
161 nine had QTL in other environments by this more permissive threshold. Thus, the majority of the  
162 63 single-environment QTL most likely result from environmentally contingent genetic effects  
163 on the ionome.

#### 164 **QTL by Environment Interactions**

165 That QTL detection was so strongly affected by environment suggested that the effects of  
166 allelic variation on element concentration were heavily dependent on environmental variables.  
167 These results, however, did not specifically test for QTL by environment interactions (QEI).  
168 Comparison between environments in our data is additionally complicated because different  
169 subsamples of the IBM population were grown at these different locations and years. While there

170 are many different approaches to identifying QEI described in the literature (summarized in El-  
171 Soda et al. (16)) we focused on two previously implemented methods. The first considered  
172 location (but not year) by comparing the goodness of fit for linear models with and without an  
173 interactive covariate (17–19). The second method takes advantage of the ability to grow the same  
174 RILs in multiple years. Trait values measured in the same IBM line for the same element at the  
175 same site but in different years were subtracted from each other and the difference between years  
176 was assigned as the trait value for that RIL genotype for QTL detection (20, 21).

177 **Linear model estimation of QTL by location effects.** The most common approach to analyze  
178 QEI is to fit a linear model with environment as both a cofactor and an interactive covariate and  
179 compare results to a model with environment as an additive covariate (22). This method is most  
180 amenable when data are available for the same lines grown in every environment, which was not  
181 the case across all of our dataset. Data from the three locations with two replicate years each (FL,  
182 IN, NY) were analyzed to reduce the number of covariates and increase the power to detect  
183 variation from the environment. The data for both years in each location were combined (FL05  
184 & FL06, IN09 & IN10, NY05, NY06 & NY12), designating covariates based on location.

185 Two linear QTL models were fit to the combined data using the FL, IN, and NY locations  
186 as covariates. These models, as detailed in Bhatia et al., reflect the dependence of phenotypic  
187 variance on genetic variance, environmental variance, and genetic by environmental variance.

$$188 \quad y_i = \mu + \beta_g g_i + \beta_x x_i + \gamma g_i x_i + \varepsilon_i \quad (1)$$

$$189 \quad y_i = \mu + \beta_g g_i + \beta_x x_i + \varepsilon_i \quad (2)$$

190 The first equation fit (1) is the full model considering the phenotype of individual  $i$  ( $y_i$ ) as  
191 controlled by genotype ( $g_i$ ), location ( $x_i$ ), and genotype by location interaction ( $g_i x_i$ ), while the  
192 reduced model (2) estimates phenotypic without considering genotype by location interaction,

193 using genotype and location as purely additive factors.  $B_g$  and  $B_x$  represent the additive effects of  
194 genotype and environment, respectively, while  $\gamma$  represents the effect of the genotype by  
195 environment interaction. These effects can be estimated through comparison of likelihood  
196 functions for each model to a null model. Subtracting the likelihood ratios of the reduced model  
197 (2) from the full model (1) will isolate the effect of genetic by environment interaction.

198         The program R/qtl was used to fit QTL using both the full and reduced models for sample  
199 weight and 20 elements, with three locations encoded as covariates in the environment term. For  
200 each marker, LOD scores resulting from the reduced QTL model were subtracted from LOD  
201 scores determined by the full model, leaving a LOD score for each marker representing solely  
202 the significance of the genetic by location component. The significance threshold for the  
203 subtracted LOD scores was calculated by using 1000 permutations of the three step procedure  
204 (fitting the two models with randomized data and then subtracting LOD scores). Even with this  
205 underpowered dataset, 10 QTL by location interactions exceeded the threshold ( $\alpha= 0.05$ , Table  
206 2). Interactions between QTL and location are likely to be due to a combination of soil and  
207 weather differences across different locations. In the case of Ni, our initial single-element QTL  
208 mapping conducted separately on data from each environment identified differences in QTL  
209 presence or strength between FL, IN, and NY locations for a QTL located at the beginning of  
210 chromosome 9 (Fig 2). This QTL corresponds to a locus found to have a significant QTL by  
211 location effect (Table 2). Remarkably, all elemental QTL by location interactions detected by  
212 this approach affected trace element accumulation. These elements are both low in concentration  
213 in the grain, and often variable among soils (23). Cd, an element for which we found significant  
214 QEI, has detrimental effects on both human and plant health (24) and is toxic in food at levels as  
215 low as .05 ppm. (25). The locus with the strongest QEI for Cd does not follow location averages

216 of Cd content in the grain (Table S3) and therefore is unlikely to be affected by crossing a  
217 detection threshold driven by higher Cd in the soils at those locations. The lack of direct  
218 correlation between QTL significance and grain content also occurs for the loci with strong by-  
219 location effects for Mo and Ni. This demonstrates that reduced cadmium or enhanced  
220 micronutrient contents in grain require plant breeding selections that consider complex genetic  
221 by environment interactions rather than genotypes assessed in a single soil environment.

222 **Table 2. QTL with Significant by-Location interactions.**

| Trait | Chr | Pos (cM) | LOD   | Significance Threshold <sup>†</sup> |
|-------|-----|----------|-------|-------------------------------------|
| Mn    | 1   | 232.4    | 7.03  | 4.59                                |
| Mn    | 5   | 195.8    | 4.61  | 4.59                                |
| Fe    | 5   | 204.6    | 4.50  | 3.94                                |
| Ni    | 1   | 410.3    | 6.15  | 4.69                                |
| Ni    | 9   | 7.7      | 28.50 | 4.69                                |
| Cu    | 7   | 165.9    | 5.31  | 4.72                                |
| Zn    | 4   | 157.4    | 4.44  | 4.13                                |
| Rb    | 2   | 185.3    | 3.38  | 2.80                                |
| Mo    | 1   | 378.0    | 48.49 | 4.20                                |
| Cd    | 2   | 214.6    | 20.26 | 3.87                                |

223 <sup>†</sup> $\alpha=0.05$

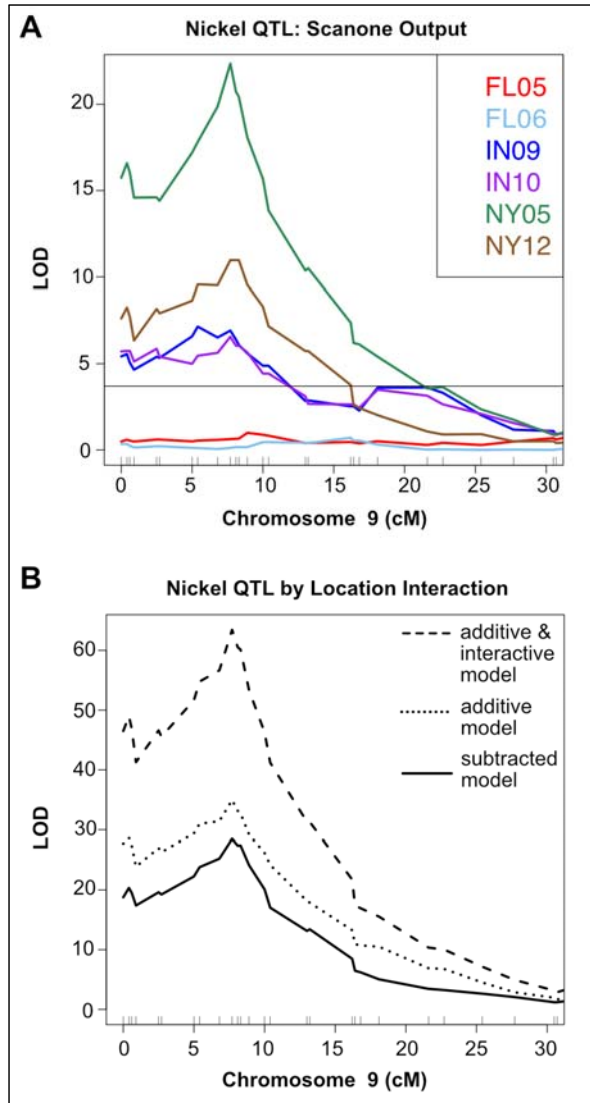

224

225 **Fig 2. Significant QTL-by-Location Interactions Reflect Variation in Single Environment**  
226 **Mapping.** (A) Nickel QTL on chromosome 9 exhibits variation between FL, IN, and NY  
227 growouts in single environment QTL mapping. Scanone QTL mapping output for Ni on is  
228 plotted for FL05, FL06, IN09, IN10, NY05, and NY12. LOD score is plotted on the y-axis and  
229 cM position on the x-axis. Horizontal line corresponds to significance threshold ( $\alpha= 0.05$ ). (B)  
230 Scanone QTL mapping for combined Ni data from Florida (FL05 and FL06), Indiana (IN09 and  
231 IN10), and New York (NY05 and NY12) growouts. All lines within each location were included,  
232 with covariates designated based on location. QTL mapping output using model with location as  
233 an additive covariate is shown as dotted line. QTL mapping output from model with location as  
234 both an additive and interactive covariate shown as dashed line. Subtracted LOD score profile  
235 from the two models (QTL by location interactive effect only) shown as solid line. Horizontal  
236 line corresponds to significance threshold for QTL by location interaction effect, derived from  
237 1000 iterations of the three step procedure using randomized data: scanone QTL mapping with  
238 the additive model, scanone QTL mapping with the additive and interactive model, and  
239 subtraction of the two models.

240 **QTL for trait differences within location.** The previous method identified genotypes with  
 241 interactions with location but not with year. Year to year variation will also have effects due to  
 242 differences in rainfall, temperature and management practices. To examine variation that occurs  
 243 within a location over different years, we examined the intra-location QEI in the three locations  
 244 (FL05 & FL06, IN09 & IN10, NY05 & NY12). QTL were mapped using the stepwise algorithm  
 245 on the trait differences between common lines in the two environments for sample weight and 20  
 246 elements. This approach identified loci affecting phenotypic differences between the same lines  
 247 grown on the same farm but in different years. Six QTL were found for FL05-FL06 differences,  
 248 one QTL for IN09-IN10 differences, and two QTL for NY05-NY12 differences (Table 3). These  
 249 trait-difference QTL included locations identified in our single element/environment QTL  
 250 experiment where a locus was present for one year but not the other or the QTL was found in  
 251 both years with differing strength (Fig 3A, B, C). Six of the difference QTL were detected at  
 252 locations where no QTL were detected when the years were mapped separately, revealing novel  
 253 gene by environment interactions not obvious from the single year data. These significant effects  
 254 of year to year environmental variation within the same location indicated that factors beyond  
 255 location are both influencing the ionome and determining the consequences of genetic variation.  
 256

257 **Table 3. Significant QTL for Trait Differences.**

| Location | Years Compared | Trait | Chr | Pos (cM) | LOD  | Significance Threshold <sup>†</sup> |
|----------|----------------|-------|-----|----------|------|-------------------------------------|
| FL       | FL05_FL06      | Mg    | 8   | 294.4    | 5.23 | 3.74                                |
| FL       | FL05_FL06      | P     | 4   | 130.2    | 3.89 | 3.60                                |
| FL       | FL05_FL06      | P     | 4   | 297.8    | 6.03 | 3.60                                |
| FL       | FL05_FL06      | P     | 8   | 294.6    | 8.43 | 3.60                                |
| FL       | FL05_FL06      | Co    | 1   | 296.3    | 4.36 | 3.69                                |
| FL       | FL05_FL06      | Mo    | 1   | 378.6    | 6.10 | 3.70                                |
| IN       | IN09_IN10      | Fe    | 8   | 140.9    | 4.52 | 3.62                                |
| NY       | NY05_NY12      | K     | 5   | 154.2    | 4.25 | 3.61                                |
| NY       | NY05_NY12      | Sr    | 7   | 193.2    | 4.45 | 3.66                                |

258 †  $\alpha = 0.05$

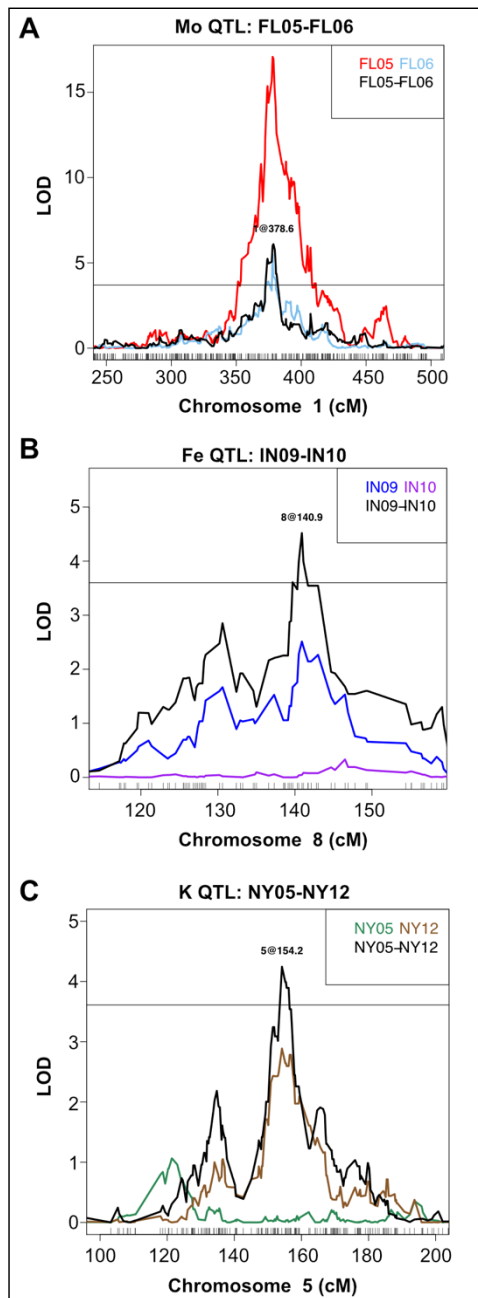

259

260 **Fig 3. Comparison of QTL Mapped on Traits in Single Environments and Trait**  
261 **Differences Between Environments.** Examples from stepwise QTL mapping on trait  
262 differences of between two years at one location, calculated between IBM lines common to both  
263 years. Scanone QTL mapping output is plotted for the same trait from each year separately. LOD  
264 score is plotted on the y-axis and cM position on the x-axis. Horizontal lines correspond to  
265 significance threshold ( $\alpha = 0.05$ ). (A) Molybdenum QTL on chromosome 1 mapped for Mo in  
266 FL05, Mo in FL06, and difference in Mo content between FL05 and FL06. (B) Iron QTL on  
267 chromosome 8 mapped for Fe in IN09, Fe in IN10, and difference in Fe content between IN09

268 and IN10. (C) Potassium QTL on chromosome 5 mapped for K in NY05, K in NY12, and  
269 difference in K content between NY05 and NY12.

## 270 **Discussion**

271         The results described here demonstrate that the concentrations of elements in the kernels  
272 of maize are strongly affected by the interaction of genetics with growth environment.  
273 Dramatically, element concentration is highly heritable within an environment and varied  
274 between environments. The presence of a large number of single-environment QTL is consistent  
275 with the hypothesis that environment has a significant impact on genetic factors influencing the  
276 ionome. By changing the stringency of the statistical tests, we are able to discount the likelihood  
277 that that these single environment QTL are the result of a large number of false positives or false  
278 negatives. The structure of our data, with few lines measured across all locations and years,  
279 limited our ability to test for direct QTL by environment interactions. As a result, we have likely  
280 underestimated the extent of QEI. Future studies with uniform lines across environments will  
281 allow for inclusion of data from all environments and lines and increase power to detect  
282 additional genetic by environment interactions.

283         Nevertheless, we were able identify QEI over different locations and QEI at a single  
284 location over different years. We identified a strong nickel QTL on chromosome 9 that was  
285 found in Indiana and New York with single-environment QTL mapping, but not in Florida. This  
286 same locus also identified as a significant location-interacting QTL when using a model that  
287 included Indiana, New York, and Florida as covariates. One possible cause for this, and other  
288 location specific QTL, might be differences in element availability between local soil  
289 environments. Interestingly, the presence/absence of the QTL does not seem to correlate with the  
290 mean levels of the elements in the grains sampled from that location, suggesting that QEI are not  
291 being driven solely by altered availability of the elements in the soil. Local soil differences are



292 less likely to be driving the QTL found for pairwise differences between two years at one  
293 location. Soil content should remain relatively similar from year to year at the same farm,  
294 suggesting that the loci identified by comparison between years and within location will encode  
295 components of elemental regulatory processes responsive to precipitation, temperature, or other  
296 weather changes. Experiments with more extensive weather and soil data, or carefully  
297 manipulated environmental contrasts, are needed to create models with additional covariates and  
298 precisely model environmental impacts.

299         Although the mapping intervals do not provide gene-level resolution, several QTL  
300 overlap with known elemental regulation genes, such as the QTL on chromosome 1 at 378 cM  
301 which coincides with ZEAMMB73\_045160, an ortholog of the Arabidopsis molybdenum  
302 transporter, MOT1. We observe strong effects and replication of this QTL across nearly all  
303 environments, suggesting that this MOT1 plays a role in a variety of environments. Other large  
304 effect QTL found in several environments merit further investigation, as they may recapitulate  
305 important element-associated genes that have yet to be identified. Identification of the genes  
306 underlying these QTL and the gene/environmental variable pairs underlying the QEIs will  
307 improve our understanding of the factors controlling plant elemental uptake and productivity.  
308 Given the high levels of variability that the interaction between genotype and environmental  
309 factors can induce in these traits, conventional breeding approaches that look for common  
310 responses across many different environments for a single trait may fail to improve the overall  
311 elemental content, necessitating rational approaches that include both genetic and environmental  
312 factors.

### 313 **Conclusions**

314         Here we have shown that the maize kernel ionome is determined by genetic and

315 environmental factors, with a large number of genetic by environment interactions. Elemental  
316 profiling of the IBM population across 10 environments allowed us to capture environmentally-  
317 driven variation in the ionome. Our QTL analysis on elements found mainly single-environment  
318 QTL, indicative of substantial genetic by environment interaction in establishment of the  
319 elemental composition of the maize grain. This approach, along with identification of QEI  
320 occurring both within a single location over different years and QEI between different locations,  
321 demonstrated that gene by environment interactions underlie elemental accumulation in maize  
322 kernels.

## 323 **Methods**

### 324 **Field Growth and Data Collection**

325 **Population and field growth.** Subsets of the intermated B73 x Mo17 recombinant inbred (IBM)  
326 population were grown in 10 different environments: Homestead, Florida in 2005 (220 lines)  
327 and 2006 (118 lines), West Lafayette, Indiana in 2009 (193 lines) and 2010 (168 lines), Clayton,  
328 North Carolina in 2006 (197 lines), Poplar Ridge, New York in 2005 (256 lines), 2006 (82 lines),  
329 and 2012 (168 lines), Columbia, Missouri in 2006 (97 lines), and Limpopo, South Africa in 2010  
330 (87 lines). In all but three environments, NY05, NC06, and MO06, one replicate was sampled  
331 per line. In NY05, 3 replicates of 199 lines, 2 replicates of 50 lines, and 1 replicate of 7 lines  
332 were sampled. A replicate is considered pooled ears from a row. Several ears were harvested and  
333 kernels were subsampled from pooled ears from the row. After harvesting, seeds were stored in  
334 local temperature and humidity controlled seed storage rooms. Subsequently they were shipped  
335 to the ionomics lab where they were stored in temperature-controlled conditions. Because each  
336 batch of seed was treated identically, any losses in weight or increases in weight due to differing  
337 hydration should not affect the relative, weight-adjusted concentrations used for analysis. We do

338 not expect any changes in ion composition due to storage. Table S1 includes planting dates and  
339 line numbers after outlier removal and genotype matching. After outlier removal, 199 of the 233  
340 unique lines in the experiment were present in 3 or more of the 10 environments. 106 lines were  
341 present in 7 or more of the environments.

#### 342 **Elemental Profile Analysis**

343 Elemental profile analysis is conducted as a standardized pipeline in the Baxter Lab. The  
344 methods used for elemental profile analysis are as described in Ziegler et al. (26). Descriptions  
345 taken directly are denoted by quotation marks.

346 **Sample preparation and digestion.** Lines from the IBM population from each environment  
347 were analyzed for the concentrations of 20 elements. “Seeds were sorted into 48-well tissue  
348 culture plates, one seed per well. A weight for each individual seed was determined using a  
349 custom built weighing robot. The weighing robot holds six 48-well plates and maneuvers each  
350 well of the plates over a hole which opens onto a 3-place balance. After recording the weight,  
351 each seed was deposited using pressurized air into a 16×110 mm borosilicate glass test tube for  
352 digestion. The weighing robot can automatically weigh 288 seeds in approximately 1.5 hours  
353 with little user intervention.”

354 “Seeds were digested in 2.5 mL concentrated nitric acid (AR Select Grade, VWR) with  
355 internal standard added (20 ppb In, BDH Aristar Plus). Seeds were soaked at room temperature  
356 overnight, then heated to 105°C for two hours. After cooling, the samples were diluted to 10 mL  
357 using ultrapure 18.2 MΩ water (UPW) from a Milli-Q system (Millipore). Samples were stirred  
358 with a custom-built stirring rod assembly, which uses plastic stirring rods to stir 60 test tubes at a  
359 time. Between uses, the stirring rod assembly was soaked in a 10% HNO<sub>3</sub> solution. A second

360 dilution of 0.9 mL of the 1st dilution and 4.1 mL UPW was prepared in a second set of test tubes.  
361 After stirring, 1.2 mL of the second dilution was loaded into 96 well autosampler trays.”

362 **Ion Coupled plasma mass spectrometry analysis.** Elemental concentrations of B, Na, Mg, Al,  
363 P, S, K, Ca, Mn, Fe, Co, Ni, Cu, Zn, As, Se, Rb, Sr, Mo, and Cd “were measured using an Elan  
364 6000 DRC-e mass spectrometer (Perkin-Elmer SCIEX) connected to a PFA microflow nebulizer  
365 (Elemental Scientific) and Apex HF desolvator (Elemental Scientific). Samples were introduced  
366 using a SC-FAST sample introduction system and SC4-DX autosampler (Elemental Scientific)  
367 that holds six 96-well trays (576 samples).” Measurements were taken with dynamic reaction cell  
368 (DRC) collision mode off. “Before each run, the lens voltage and nebulizer gas flow rate of the  
369 ICP-MS were optimized for maximum Indium signal intensity (>25,000 counts per second)  
370 while also maintaining low CeO<sup>+</sup>/Ce<sup>+</sup> (<0.008) and Ba<sup>++</sup>/Ba<sup>+</sup> (<0.1) ratios. This ensures a  
371 strong signal while also reducing the interferences caused by polyatomic and double-charged  
372 species. Before each run a calibration curve was obtained by analyzing six dilutions of a multi-  
373 element stock solution made from a mixture of single-element stock standards (Ultra Scientific).  
374 In addition, to correct for machine drift both during a single run and between runs, a control  
375 solution was run every tenth sample. The control solution is a bulk mixture of the remaining  
376 sample from the second dilution. Using bulked samples ensured that our controls were perfectly  
377 matrix matched and contained the same elemental concentrations as our samples, so that any  
378 drift due to the sample matrix would be reflected in drift in our controls. The same control  
379 mixture was used for every ICP-MS run in the project so that run-to-run variation could be  
380 corrected. A run of 576 samples took approximately 33 hours with no user intervention. The time  
381 required for cleaning of the instrument and sample tubes as well as the digestions and transfers  
382 necessary to set up the run limit the throughput to three 576 sample runs per week.”

### 383 **Computational Analysis**

384 **Drift correction and analytical outlier removal.** Analytical outliers were removed from single-  
385 seed measurements using a method described in Davies and Gather (1993). Briefly, values were  
386 considered an outlier and removed from further analysis if the median absolute deviation  
387 (MAD), calculated based on the line and location where the seed was grown, was greater than  
388 6.2.

389 Normalization for seed weight by simply dividing each seed's solution concentration by  
390 sample weight resulted in a bias where smaller seeds often exhibited a higher apparent elemental  
391 concentration, especially for elements whose concentration is at or near the method detection  
392 limit. This bias is likely either a result of contamination during sample processing, a systematic  
393 over or under reporting of elemental concentrations by the ICP-MS or a violation of the  
394 underlying assumption that elemental concentration in seeds scales linearly with seed weight.  
395 Instead, we developed a method whereby the residuals from the following linear model:

396

$$Y = \beta_0 + \beta_1 X_1 + \beta_2 X_2 + e$$

397

398 where Y is the non-weight normalized measure of elemental concentration for each seed after  
399 digestion,  $\beta_0$  is the population mean,  $X_1$  is the seed weight,  $X_2$  is the analytical experiment the  
400 seed was run in (to further correct for run-to-run variation between analytical experiments), and  $e$   
401 is the residual (error) term. The residuals in this linear model represent how far each data point  
402 departs from our assumption that analyte concentration will scale linearly with sample weight. If  
403 all samples have the same analyte concentration then the linear model will be able to perfectly  
404 predict analyte concentration from weight and the residuals will all equal zero. However, if a

405 sample has a higher or lower concentration of an analyte than the general population being  
406 measured, then it will have a residual whose value represents the estimated concentration  
407 difference from the population mean. For this reason, we have termed this value the estimated  
408 concentration difference from the mean (ECDM).

409 **Heritability calculation.** Broad-sense heritability was calculated for seed weight and 20  
410 elements across environments and within three environments for which we had substantial  
411 replicate data. To calculate the broad-sense heritability across 10 environments, the total  
412 phenotypic variance was partitioned into genetic and environmental variance, with the broad-  
413 sense heritability being the fraction of phenotypic variance that is genetic. This was done using  
414 an unbalanced, type II analysis of variance (ANOVA) in order to account for the unbalanced  
415 common line combinations across environments. Two models were fit using the *lmfit* function in  
416 R. The first model included genetic variance as the first term and environmental variance as the  
417 second. The second model had the opposite form. The sum of squares for genetic or  
418 environmental components was obtained using the *anova* function on the model in which that  
419 component was the second term. Broad-sense heritability was calculated by dividing the genetic  
420 sum of squares by the total (genetic plus environmental) sum of squares. Heritability was  
421 calculated within environments for NY05, NC06, and MO06. Data with outliers designated as  
422 NA was used for each environment. For each element within an environment, lines with NA  
423 were removed and lines with only 1 replicate were removed, leaving only lines with 2 or more  
424 replicates. The heritability was then calculated for seed weight and each element using *lmfit*  
425 followed by *anova* functions to obtain the sum of squares for the genetic component and the  
426 residuals. Broad-sense heritability was calculated as the proportion of total variance (genetic plus  
427 residuals) explained by the genetic component.

428 **QTL mapping: elemental traits.** The R package R/qtl was used for QTL mapping. For each of  
429 the 10 environments, elemental trait line averages and genotypes for all lines, 4,217 biallelic  
430 single nucleotide polymorphisms (SNPs) distributed across all 10 maize chromosomes, were  
431 formatted into an R/qtl cross object. The *stepwiseqtl* function was used to implement the  
432 stepwise method of QTL model selection for 21 phenotypes (seed weight, 20 elements). The max  
433 number of QTL allowed for each trait was set at 10 and the penalty for addition of QTL was set  
434 as the 95<sup>th</sup> percentile LOD score from 1000 *scanone* permutations, with imputation as the  
435 selected model for *scanone*. A solely additive model was used; epistatic and interaction effects  
436 were not considered and thus heavy and light interaction penalties were set at 0. QTL positions  
437 were optimized using *refineqtl*, which considers each QTL one at a time, in random order,  
438 iteratively scanning in order to move the QTL to the highest likelihood position. QTL models for  
439 each trait in each environment were obtained using this procedure. QTL within 5 cM of each  
440 other were designated as the same QTL.

441 **QTL by environment analysis: linear model comparison.** Linear modeling was used  
442 determine instances and strength of QEI using all data from two years within three locations (FL,  
443 IN, NY). The specific growouts analyzed together were FL05, FL06, IN09, IN10, NY05, and  
444 NY12. FL, IN, and NY were then used as covariates in QTL analysis. Two QTL models, one  
445 with location as an additive and interactive covariate and one with location as only an additive  
446 covariate, were fit for each phenotype (sample weight, 20 elements) using the *scanone* function  
447 in R/qtl,

$$448 \quad y_i = \mu + \beta_g g_i + \beta_x x_i + \gamma g_i x_i + \varepsilon_i \quad (1)$$

$$449 \quad y_i = \mu + \beta_g g_i + \beta_x x_i + \varepsilon_i \quad (2)$$

450 where  $y_i$  is the phenotype of individual  $i$ ,  $g_i$  is the genotype of individual  $i$ , and  $x_i$  is the location

451 of individual  $i$ .  $B_g$  and  $B_x$  are additive effects of genotype and environment, respectively, and  $\gamma$  is  
452 the effect of genotype by environmental interaction. LOD scores for each marker using model  
453 (2) were subtracted from LOD scores for each marker using model (1) to the isolate genetic by  
454 location effect. QTL by location interaction was determined as QTL with a significant LOD  
455 score after subtraction. The significance threshold was calculated from 1000 permutations of the  
456 three step procedure (fitting the two models and then subtracting LOD scores) and taking the 95<sup>th</sup>  
457 percentile of the highest LOD score.

458 **QTL by environment analysis: mapping on within-location differences.** QTL were mapped  
459 on phenotypic differences between common lines grown over two years at a single location. This  
460 procedure was used to compare FL05 and FL06, IN09 and IN10, and NY05 and NY12 by  
461 calculating the differences for each trait value between common lines in location pairs (FL05-  
462 FL06, IN09-IN10, NY05-NY12) and using these differences for analysis using the previously  
463 described *stepwiseqtl* mapping and permutation procedure.

## 464 **Acknowledgements**

465 The authors would like to thank Justin Borevitz and Riyan Cheng, and Tom Juenger for  
466 advice on QTL by environment mapping and Karl Broman for invaluable assistance with R/qtl.  
467 The authors would especially like to thank our field collaborators Sherry Flint-Garcia, Peter  
468 Balint-Kurti, Torbert Rocheford, Jonathan Lynch, and Robert Snyder for their dedicated efforts  
469 to provide the seeds analyzed for this project.

## 470 **References**

- 471 1. McDowell SC, Akmakjian G, Sladek C et al. Elemental Concentrations in the Seed of  
472 Mutants and Natural Variants of *Arabidopsis thaliana* Grown under Varying Soil



- 473 Conditions. PLoS ONE. 2013;8:e63014.
- 474 2. Cobb JN, DeClerck G, Greenberg A, Clark R, McCouch S. Next-generation phenotyping:  
475 requirements and strategies for enhancing our understanding of genotype-phenotype  
476 relationships and its relevance to crop improvement. *Theor Appl Genet.* 2013;126:867-887.
- 477 3. Lahner B, Gong J, Mahmoudian M et al. Genomic scale profiling of nutrient and trace  
478 elements in *Arabidopsis thaliana*. *Nat Biotechnol.* 2003;21:1215-1221.
- 479 4. Koornneef M, Alonso-Blanco C, Peeters AJM. Genetic approaches in plant physiology.  
480 *New Phytologist.* 1997;137:1-8.
- 481 5. Lee M, Sharopova N, Beavis WD et al. Expanding the genetic map of maize with the  
482 intermated B73 x Mo17 (IBM) population. *Plant molecular biology.* 2002;48:453-461.
- 483 6. Balint-Kurti PJ, Zwonitzer JC, Wisser RJ et al. Precise Mapping of Quantitative Trait Loci  
484 for Resistance to Southern Leaf Blight, Caused by *Cochliobolus heterostrophus* Race O,  
485 and Flowering Time Using Advanced Intercross Maize Lines. *Genetics.* 2007;176:645-657.
- 486 7. Dubois PG, Olsefski GT, Flint-Garcia S, Setter TL, Hoekenga OA, Brutnell TP.  
487 Physiological and Genetic Characterization of End-of-Day Far-Red Light Response in  
488 Maize Seedlings. *Plant Physiol.* 2010;154:173-186.
- 489 8. Hazen SP, Hawley RM, Davis GL, Henrissat B, Walton JD. Quantitative Trait Loci and  
490 Comparative Genomics of Cereal Cell Wall Composition. *Plant Physiology.* 2003;132:263-  
491 271.
- 492 9. Lung'aho MG, Mwaniki AM, Szalma SJ et al. Genetic and physiological analysis of iron  
493 biofortification in maize kernels. *PLoS One.* 2011;6:e20429.
- 494 10. Ordas B, Malvar RA, Santiago R, Butron A. QTL mapping for Mediterranean corn borer  
495 resistance in European flint germplasm using recombinant inbred lines. *BMC Genomics.*

- 496 2010;11:1-10.
- 497 11. Zhang N, Gibon Y, Gur A et al. Fine Quantitative Trait Loci Mapping of Carbon and  
498 Nitrogen Metabolism Enzyme Activities and Seedling Biomass in the Maize IBM Mapping  
499 Population. *Plant Physiology*. 2010;154:1753-1765.
- 500 12. Shakoor N, Ziegler G, Dilkes BP et al. Integration of experiments across diverse  
501 environments identifies the genetic determinants of variation in Sorghum bicolor seed  
502 element composition. *Plant physiology*. 2016pp-01971.
- 503 13. Broman KW, Speed TP. A model selection approach for the identification of quantitative  
504 trait loci in experimental crosses. *Journal of the Royal Statistical Society: Series B*  
505 (Statistical Methodology). 2002;64:641-656.
- 506 14. Churchill GA, Doerge RW. Empirical threshold values for quantitative trait mapping.  
507 *Genetics*. 1994;138:963-971.
- 508 15. Baxter I, Muthukumar B, Park HC et al. Variation in Molybdenum Content Across Broadly  
509 Distributed Populations of *Arabidopsis thaliana* Is Controlled by a Mitochondrial  
510 Molybdenum Transporter (*MOT1*). *PLoS Genet*. 2008;4:e1000004.
- 511 16. El-Soda M, Malosetti M, Zwaan BJ, Koornneef M, Aarts MGM. Genotype x environment  
512 interaction QTL mapping in plants: lessons from *Arabidopsis*. *Trends in Plant*  
513 *Science*. 2014;19:390-398.
- 514 17. Bhatia A, Yadav A, Zhu C et al. Yeast Growth Plasticity Is Regulated by Environment-  
515 Specific Multi-QTL Interactions. *G3*. 2014;4:769-777.
- 516 18. Leinonen PH, Remington DL, Leppälä J, Savolainen O. Genetic basis of local adaptation  
517 and flowering time variation in *Arabidopsis lyrata*. *Molecular ecology*. 2013;22:709-723.
- 518 19. Nichols KM, Broman KW, Sundin K, Young JM, Wheeler PA, Thorgaard GH.

- 519 Quantitative Trait Loci x Maternal Cytoplasmic Environment Interaction for Development  
520 Rate in *Oncorhynchus mykiss*. *Genetics*. 2007;175:335-347.
- 521 20. Tétard-Jones C, Kertesz MA, Preziosi RF. Quantitative trait loci mapping of phenotypic  
522 plasticity and genotype-environment interactions in plant and insect performance.  
523 *Philosophical Transactions of the Royal Society of London B: Biological Sciences*.  
524 2011;366:1368-1379.
- 525 21. Ungerer MC, Halldorsdottir SS, Purugganan MD, Mackay TFC. Genotype-Environment  
526 Interactions at Quantitative Trait Loci Affecting Inflorescence Development in *Arabidopsis*  
527 *thaliana*. *Genetics*. 2003;165:353-365.
- 528 22. Des Marais DL, Hernandez KM, Juenger TE. Genotype-by-environment interaction and  
529 plasticity: exploring genomic responses of plants to the abiotic environment. *Annual*  
530 *Review of Ecology, Evolution, and Systematics*. 2013;44:5-29.
- 531 23. White JG, Zasoski RJ. Mapping soil micronutrients. *Field Crops Research*. 1999;60:11-26.
- 532 24. Godt J, Scheidig F, Grosse-Siestrup C et al. The toxicity of cadmium and resulting hazards  
533 for human health. *J Occup Med Toxicol*. 2006;1:22.
- 534 25. United States Department of Agriculture GAIN. China's Maximum Levels of  
535 Contaminants in Food. GAIN report CH14058. 2014
- 536 26. Ziegler G, Terauchi A, Becker A, Armstrong P, Hudson K, Baxter I. Ionomics screening of  
537 field-grown soybean identifies mutants with altered seed elemental composition. *The Plant*  
538 *Genome*. 2013;6

## 539 **Supporting Information**

540 **S1 Table. Growout Information.**

541 **S2 Table. Percent Variance ( $R^2$ ) of Mo, Cd, and Ni QTL.**

542 **S3 Table. Location LOD Scores Compared to Seed Element Content.**
